# Supplementary material
Source: publisher site journal article supplement (https://www.dovepress.com/article/262085)
Supplement: Supplementary file 1 [file get_supplementary_file.php]

## Appendix 1: Search Strategy for Ovid MEDLINE and Ovid EMBASE

| #  | Searches                                                                                                                            |
|----|-------------------------------------------------------------------------------------------------------------------------------------|
| 1  | american journal of ophthalmology.jn.                                                                                               |
| 2  | progress in retinal & eye research.jn.                                                                                              |
| 3  | ophthalmology.jn.                                                                                                                   |
| 4  | jama ophthalmology.jn.                                                                                                              |
| 5  | ocular surface.jn.                                                                                                                  |
| 6  | british journal of ophthalmology.jn.                                                                                                |
| 7  | journal of refractive surgery.jn.                                                                                                   |
| 8  | retina.jn.                                                                                                                          |
| 9  | survey of ophthalmology.jn.                                                                                                         |
| 10 | experimental eye research.jn.                                                                                                       |
| 11 | investigative ophthalmology & visual science.jn.                                                                                    |
| 12 | acta ophthalmologica.jn.                                                                                                            |
| 13 | graefes archive for clinical & experimental ophthalmology.jn.                                                                       |
| 14 | albrecht von graefes archiv fur klinische und experimentelle ophthalmologie.jn.                                                     |
| 15 | current opinion in ophthalmology.jn.                                                                                                |
| 16 | journal of cataract & refractive surgery.jn.                                                                                        |
| 17 | journal of vision.jn.                                                                                                               |
| 18 | ophthalmic & physiological optics.jn.                                                                                               |
| 19 | eye.jn.                                                                                                                             |
| 20 | current eye research.jn.                                                                                                            |
| 21 | journal of glaucoma.jn.                                                                                                             |
| 22 | molecular vision.jn.                                                                                                                |
| 23 | cornea.jn.                                                                                                                          |
| 24 | journal of neuro ophthalmology.jn.                                                                                                  |
| 25 | 1 or 2 or 3 or 4 or 5 or 6 or 7 or 8 or 9 or 10 or 11 or 12 or 13 or 14 or 15 or 16 or 17 or 18 or 19 or 20 or 21 or 22 or 23 or 24 |
| 26 | Macula Lutea/ or Macular Edema/ or Diabetic Retinopathy/ or diabetic macular edema.mp.                                              |
| 27 | macular edema.mp. or Macular Edema/                                                                                                 |
| 28 | diabetic retinopathy.mp.                                                                                                            |
| 29 | macula.mp.                                                                                                                          |
| 30 | retina.mp.                                                                                                                          |
| 31 | 26 or 27 or 28 or 29 or 30                                                                                                          |
| 32 | dexamethasone.mp. or Dexamethasone/ or Glucocorticoids/                                                                             |
| 33 | Triamcinolone/ or triamcinolone.mp.                                                                                                 |
| 34 | Fluocinolone Acetonide/ or fluocinolone.mp.                                                                                         |
| 35 | steroid.mp. or Steroids/                                                                                                            |
| 36 | Intravitreal Injections/ or intravitreal.mp.                                                                                        |
| 37 | implants.mp.                                                                                                                        |
| 38 | Drug Implants/ or intravitreal implant.mp.                                                                                          |
| 39 | 32 or 33 or 34 or 35 or 36 or 37 or 38                                                                                              |
| 40 | 25 and 31 and 39                                                                                                                    |

*Databases were searched from inception through July 16, 2018*
